# Supplementary material
Source: publisher figshare collection journal article supplement (https://acs.figshare.com/ndownloader/files/6979463)
Supplement: Supplementary file 1 [file 6979463]

data_global 
_audit_creation_date        "2016-04-07"
_audit_creation_method CRYSTALS_ver_14.61

_oxford_structure_analysis_title  'pr57_123k in P212121'
_chemical_name_systematic         ?
_chemical_melting_point           ?

#looking for refcif 
 
 
_publ_contact_author_name         'Markus Neuburger' 
_publ_requested_coeditor_name     'Markus.Neuburger@unibas.ch' 
_publ_contact_author_address	     'University of Basel' 
 
data_1 
 
_exptl_crystal_recrystallization_method 
; 
 
; 
 
_publ_section_exptl_refinement 
; 
The H atoms were all positioned geometrically. 
U~iso~(H) (in the range 1.2 times U~eq~ of the parent atom), 
the positions were refined with riding constraints. 
; 
 
#see the bottom part of the file for the full list of the applied restraints. 
 
#end of refcif 
_cell_length_a                    6.3779(3)
_cell_length_b                    19.3600(8)
_cell_length_c                    31.3111(12)
_cell_angle_alpha                 90
_cell_angle_beta                  90
_cell_angle_gamma                 90
_cell_volume                      3866.17(15)
 
_symmetry_cell_setting            'orthorhombic' 
_symmetry_space_group_name_H-M    'P 21 21 21' 
_symmetry_space_group_name_Hall   'P 2ac 2ab' 
loop_
 _symmetry_equiv_pos_as_xyz
 'x,y,z'
 'x+1/2,-y+1/2,-z'
 '-x,y+1/2,-z+1/2'
 '-x+1/2,-y,z+1/2'

loop_
_atom_type_symbol
_atom_type_scat_dispersion_real
_atom_type_scat_dispersion_imag
_atom_type_scat_Cromer_Mann_a1
_atom_type_scat_Cromer_Mann_b1
_atom_type_scat_Cromer_Mann_a2
_atom_type_scat_Cromer_Mann_b2
_atom_type_scat_Cromer_Mann_a3
_atom_type_scat_Cromer_Mann_b3
_atom_type_scat_Cromer_Mann_a4
_atom_type_scat_Cromer_Mann_b4
_atom_type_scat_Cromer_Mann_c
_atom_type_scat_source  
 C       0.0137   0.0067   2.3100  20.8439   1.0200  10.2075   1.5886   0.5687
   0.8650  51.6512   0.2156 'International Tables Vol C 4.2.6.8 and 6.1.1.4'
 H       0.0000   0.0000   0.4930  10.5109   0.3229  26.1257   0.1402   3.1424
   0.0408  57.7998   0.0030 'International Tables Vol C 4.2.6.8 and 6.1.1.4'
 O       0.0389   0.0241   3.0485  13.2771   2.2868   5.7011   1.5463   0.3239
   0.8670  32.9089   0.2508 'International Tables Vol C 4.2.6.8 and 6.1.1.4'
 
 
_cell_formula_units_Z                    8

# Given Formula = C14.50 H11 O0.50 
# Dc =      0.66 Fooo =   1632.00 Mu =      1.93 M =    386.49
# Found Formula = C29 H22 O1 
# Dc =      1.33 FOOO =   1632.00 Mu =      3.85 M =    772.99

_chemical_formula_sum             'C29 H22 O1'
_chemical_formula_moiety          'C29 H22 O1'
_chemical_compound_source                ?
_chemical_formula_weight            386.49
 
 
_cell_measurement_reflns_used            0
_cell_measurement_theta_min              0
_cell_measurement_theta_max              0
_cell_measurement_temperature          123
 
_exptl_crystal_description        'needle' 
_exptl_crystal_colour             'yellow' 
_exptl_crystal_size_min           0.020 
_exptl_crystal_size_mid           0.030 
_exptl_crystal_size_max           0.150 
 
_exptl_crystal_density_diffrn     1.328 
_exptl_crystal_density_meas       ? 
_exptl_crystal_density_method     'not measured' 
# Non-dispersive F(000): 
_exptl_crystal_F_000              1632 
_exptl_absorpt_coefficient_mu     0.385 
 
# Sheldrick geometric approximatio 0.99 0.99 
_exptl_absorpt_correction_type    multi-scan 
_exptl_absorpt_process_details    'DENZO/SCALEPACK (Otwinowski & Minor, 1997)' 
_exptl_absorpt_correction_T_min   0.99 
_exptl_absorpt_correction_T_max   0.99 
_diffrn_measurement_device_type   'Stoe StadiVari' 
_diffrn_measurement_device        'Area' 
_diffrn_detector                  'Pilatus300K'
_diffrn_detector_type             'STOE'
_diffrn_detector_area_resol_mean   5.81
_diffrn_source                    'Metaljet D2'
_diffrn_source_voltage             70
_diffrn_source_current             2.860
_diffrn_source_power               0.200
_diffrn_radiation_monochromator   'Graded multilayer mirror'
_diffrn_radiation_type             GaK\a
_diffrn_radiation_wavelength           1.34143
_diffrn_measurement_method        '\f & \w scans' 
 
# If a reference occurs more than once, delete the author 
# and date from subsequent references. 
_computing_data_collection        'STOE X-AREA (Stoe & Cie 2011)'
_computing_cell_refinement        'STOE X-AREA (Stoe & Cie 2011)'
_computing_data_reduction         'STOE X-RED (Stoe & Cie 1996)'
_computing_structure_solution     'Superflip (Palatinus & Chapuis, 2007)' 
_computing_structure_refinement   'CRYSTALS (Betteridge et al., 2003)' 
_computing_publication_material   'CRYSTALS (Betteridge et al., 2003)' 
_computing_molecular_graphics     'CAMERON (Watkin et al., 1996)' 
 
_diffrn_standards_interval_time   . 
_diffrn_standards_interval_count  . 
_diffrn_standards_number          0 
_diffrn_standards_decay_%         ? 
 
_diffrn_ambient_temperature        123
_diffrn_reflns_number             47483 
_reflns_number_total              6997 
_diffrn_reflns_av_R_equivalents   0.042 
# Number of reflections without Friedels Law is 6997 
# Number of reflections with Friedels Law is 4045 
# Theoretical number of reflections is about 3563 
 
 
_diffrn_reflns_theta_min          3.158 
_diffrn_reflns_theta_max          54.161 
_diffrn_measured_fraction_theta_max 0.990 
 
_diffrn_reflns_theta_full         52.800 
_diffrn_measured_fraction_theta_full 0.997 
 
 
_diffrn_reflns_limit_h_min        -7 
_diffrn_reflns_limit_h_max        7 
_diffrn_reflns_limit_k_min        0 
_diffrn_reflns_limit_k_max        23 
_diffrn_reflns_limit_l_min        0 
_diffrn_reflns_limit_l_max        37 
_reflns_limit_h_min               -7 
_reflns_limit_h_max               7 
_reflns_limit_k_min               0 
_reflns_limit_k_max               23 
_reflns_limit_l_min               0 
_reflns_limit_l_max               37 
 
_oxford_diffrn_Wilson_B_factor    0.00 
_oxford_diffrn_Wilson_scale       0.00 
 
_atom_sites_solution_primary      Other  #heavy,direct,difmap,geom,iterative
# _atom_sites_solution_secondary  difmap
_atom_sites_solution_hydrogens    difmap
 
_refine_diff_density_min          -0.21 
_refine_diff_density_max          0.14 
 
 
# The current dictionary definitions do not cover the 
# situation where the reflections used for refinement were 
# selected by a user-defined sigma threshold 
 
 
# The values actually used during refinement 
_oxford_reflns_threshold_expression_ref     I>0.5\s(I)
_refine_ls_number_reflns          5898 
_refine_ls_number_restraints      32 
_refine_ls_number_parameters      562 
_oxford_refine_ls_R_factor_ref    0.0423 
_refine_ls_wR_factor_ref          0.0309 
_refine_ls_goodness_of_fit_ref    0.8938 
_refine_ls_shift/su_max           0.0002586 
_refine_ls_shift/su_mean          0.0000370 
 
 
# The values computed with all filters except I/sigma 
_oxford_reflns_number_all         6997 
_refine_ls_R_factor_all           0.0546 
_refine_ls_wR_factor_all          0.0353 
 
# The values computed with a 2 sigma cutoff - a la SHELX 
_reflns_threshold_expression      I>2.0\s(I)
_reflns_number_gt                 4261 
_refine_ls_R_factor_gt            0.0311 
_refine_ls_wR_factor_gt           0.0266 
 
_refine_ls_abs_structure_Flack    0.03(17) 
_refine_ls_abs_structure_details  'Flack (1983), 2952 Friedel-pairs' 
# choose from: rm (reference molecule of known chirality), 
# ad (anomolous dispersion - Flack), rmad (rm and ad), 
# syn (from synthesis), unk (unknown) or . (not applicable). 
_chemical_absolute_configuration  'ad' 
 
 
_refine_ls_structure_factor_coef  F 
_refine_ls_matrix_type            full
_refine_ls_hydrogen_treatment     constr         #undef, noref, refall,
                                                 # refxyz, refU, constr or mixed
_refine_ls_weighting_scheme       sigma 
_refine_ls_weighting_details 
;
 Method= 
 SQRT(W) = (Data with the key SQRTW in list 6) 
;
# Insert your own references if required - in alphabetical order 
_publ_section_references 
; 
Betteridge, P.W., Carruthers, J.R., Cooper, R.I., 
Prout, K. & Watkin, D.J. (2003). J. Appl. Cryst. 36, 1487. 
 
Flack, H. D. (1983). Acta Cryst. A39, 876-881. 
 
Otwinowski, Z. & Minor, W. (1997). Methods in Enzymology, Vol. 276, 
edited by C. W. Carter Jr & R. M. Sweet, pp. 307--326. 
New York: Academic Press. 
 
Palatinus, L. & Chapuis, G. (2007). J. Appl. Cryst. 40, 786-790. 
 
Stoe & Cie (2011). X-area Software. 
 
Stoe & Cie (1996). XRED V1.08. 
 
Watkin, D.J., Prout, C.K. & Pearce, L.J. (1996). CAMERON, Chemical 
Crystallography Laboratory, Oxford, UK. 
; 

# start Validation Reply Form
_vrf_PLAT012_1
;
PROBLEM: No _shelx_res_checksum found in CIF.............     Please Check
RESPONSE: _shelx_res_checksum is and will only be available for
structures processed by SHELX
;
_vrf_PLAT183_1
;
PROBLEM: Missing _cell_measurement_reflns_used value ....     Please Do ! 
RESPONSE: The unit cell is refined at the end of the experiment using
all available reflections from the data collection
;
_vrf_PLAT184_1
;
PROBLEM: Missing _cell_measurement_theta_min value ......     Please Do ! 
RESPONSE: The unit cell is refined at the end of the experiment using
all available reflections from the data collection
;
_vrf_PLAT185_1
;
PROBLEM: Missing _cell_measurement_theta_max value ......     Please Do ! 
RESPONSE: The unit cell is refined at the end of the experiment using
all available reflections from the data collection
;
_vrf_PLAT367_1
;
PROBLEM: Long? C(sp?)-C(sp?) Bond C2-C3/C31-C32 .........       1.53 Ang. 
RESPONSE: There is disorder in the 5-membered ring as the O atom can 
be bound at two positions, C2 or C4, and C31 or C33 respectively. As the 
expected distance between the two positions of the carbon atoms C2, C4, 
C31 and C33 are very small we decided not to resolve that disorder.
;
# end Validation Reply Form

# Uequiv = arithmetic mean of Ui i.e. Ueqiv = (U1+U2+U3)/3

# Replace last . with number of unfound hydrogen atoms attached to an atom.

# ..._refinement_flags_... 
# . no refinement constraints           S special position constraint on site
# G rigid group refinement of site      R riding atom
# D distance or angle restraint on site T thermal displacement constraints
# U Uiso or Uij restraint (rigid bond)  P partial occupancy constraint

_refine_special_details
;
There is disorder in the 5-membered ring as the O atom can 
be bound at two positions, C2 or C4, and C31 or C33 respectively. As the 
expected distance between the two positions of the carbon atoms C2, C4, 
C31 and C33 are very small we decided not to resolve that disorder.
;

loop_
_atom_site_label
_atom_site_type_symbol
_atom_site_fract_x
_atom_site_fract_y
_atom_site_fract_z
_atom_site_U_iso_or_equiv
_atom_site_occupancy
_atom_site_adp_type
_atom_site_refinement_flags_posn
_atom_site_refinement_flags_adp
_atom_site_refinement_flags_occupancy
_atom_site_disorder_assembly
_atom_site_disorder_group
_atom_site_attached_hydrogens
C1 C 0.5269(3) 0.09255(9) 0.10880(5) 0.0292 1.0000 Uani . . . . . . 
C2 C 0.3821(3) 0.05147(11) 0.08270(6) 0.0356 1.0000 Uani D U . . . . 
C3 C 0.2069(3) 0.02449(10) 0.11162(6) 0.0334 1.0000 Uani . . . . . . 
C4 C 0.2670(3) 0.05023(10) 0.15660(6) 0.0351 1.0000 Uani D U . . . . 
C5 C 0.4636(3) 0.09155(10) 0.15067(6) 0.0301 1.0000 Uani . . . . . . 
C6 C 0.5763(3) 0.12678(10) 0.18287(5) 0.0293 1.0000 Uani . . . . . . 
C7 C 0.5110(3) 0.12686(9) 0.22656(6) 0.0343 1.0000 Uani . . . . . . 
C8 C 0.6208(3) 0.16150(11) 0.25673(6) 0.0381 1.0000 Uani . . . . . . 
C9 C 0.8082(3) 0.19795(10) 0.24586(5) 0.0326 1.0000 Uani . . . . . . 
C10 C 0.9253(3) 0.23340(11) 0.27724(6) 0.0408 1.0000 Uani . . . . . . 
C11 C 1.1039(3) 0.26846(11) 0.26615(6) 0.0418 1.0000 Uani . . . . . . 
C12 C 1.1738(3) 0.26961(10) 0.22416(6) 0.0375 1.0000 Uani . . . . . . 
C13 C 1.0660(3) 0.23493(10) 0.19191(5) 0.0304 1.0000 Uani . . . . . . 
C14 C 0.8799(3) 0.19852(10) 0.20305(6) 0.0305 1.0000 Uani . . . . . . 
C15 C 0.7604(3) 0.16280(9) 0.17102(6) 0.0287 1.0000 Uani . . . . . . 
C16 C 0.8273(3) 0.16418(9) 0.12746(5) 0.0279 1.0000 Uani . . . . . . 
C17 C 1.0157(3) 0.20009(9) 0.11603(5) 0.0278 1.0000 Uani . . . . . . 
C18 C 1.1383(3) 0.23452(9) 0.14748(6) 0.0302 1.0000 Uani . . . . . . 
C19 C 1.3241(3) 0.26613(10) 0.13459(6) 0.0326 1.0000 Uani . . . . . . 
C20 C 1.3884(3) 0.26568(10) 0.09236(6) 0.0351 1.0000 Uani . . . . . . 
C21 C 1.2692(3) 0.23391(9) 0.06150(6) 0.0335 1.0000 Uani . . . . . . 
C22 C 1.0817(2) 0.20071(9) 0.07257(6) 0.0306 1.0000 Uani . . . . . . 
C23 C 0.9548(3) 0.16645(10) 0.04145(6) 0.0329 1.0000 Uani . . . . . . 
C24 C 0.7785(3) 0.13235(10) 0.05217(5) 0.0331 1.0000 Uani . . . . . . 
C25 C 0.7097(3) 0.12927(9) 0.09550(5) 0.0282 1.0000 Uani . . . . . . 
C26 C 0.1675(3) -0.05420(11) 0.10816(6) 0.0437 1.0000 Uani . . . . . . 
C27 C 0.3723(4) -0.09340(13) 0.11545(7) 0.0628 1.0000 Uani . . . . . . 
C28 C 0.0793(4) -0.07230(14) 0.06429(7) 0.0719 1.0000 Uani . . . . . . 
C29 C 0.0043(4) -0.07546(14) 0.14165(7) 0.0589 1.0000 Uani . . . . . . 
H31 H 0.0724 0.0476 0.1029 0.0407 1.0000 Uiso R . . . . . 
H71 H 0.3840 0.1024 0.2337 0.0421 1.0000 Uiso R . . . . . 
H81 H 0.5743 0.1613 0.2865 0.0455 1.0000 Uiso R . . . . . 
H101 H 0.8804 0.2326 0.3065 0.0468 1.0000 Uiso R . . . . . 
H111 H 1.1805 0.2942 0.2879 0.0502 1.0000 Uiso R . . . . . 
H121 H 1.3006 0.2944 0.2170 0.0462 1.0000 Uiso R . . . . . 
H191 H 1.4138 0.2881 0.1565 0.0391 1.0000 Uiso R . . . . . 
H201 H 1.5179 0.2865 0.0844 0.0424 1.0000 Uiso R . . . . . 
H211 H 1.3141 0.2333 0.0323 0.0386 1.0000 Uiso R . . . . . 
H231 H 0.9980 0.1683 0.0122 0.0397 1.0000 Uiso R . . . . . 
H241 H 0.6950 0.1087 0.0311 0.0390 1.0000 Uiso R . . . . . 
H271 H 0.4696 -0.0845 0.0912 0.0911 1.0000 Uiso R . . . . . 
H272 H 0.4410 -0.0798 0.1433 0.0906 1.0000 Uiso R . . . . . 
H273 H 0.3413 -0.1429 0.1166 0.0931 1.0000 Uiso R . . . . . 
H281 H 0.0549 -0.1224 0.0626 0.1053 1.0000 Uiso R . . . . . 
H282 H -0.0543 -0.0482 0.0602 0.1062 1.0000 Uiso R . . . . . 
H283 H 0.1802 -0.0600 0.0418 0.1049 1.0000 Uiso R . . . . . 
H291 H -0.1229 -0.0465 0.1377 0.0872 1.0000 Uiso R . . . . . 
H292 H 0.0611 -0.0696 0.1710 0.0855 1.0000 Uiso R . . . . . 
H293 H -0.0308 -0.1246 0.1371 0.0868 1.0000 Uiso R . . . . . 
O1 O 0.3922(3) 0.04103(9) 0.04527(5) 0.0455 0.881(4) Uani D U P 1 1 . 
H41 H 0.2939 0.0114 0.1763 0.0424 0.881(4) Uiso R . P 1 1 . 
H42 H 0.1566 0.0780 0.1692 0.0438 0.881(4) Uiso R . P 1 1 . 
O101 O 0.1451(16) 0.0521(6) 0.1815(3) 0.0452 0.119(4) Uani D U P 1 2 . 
H21 H 0.4563 0.0128 0.0698 0.0418 0.119(4) Uiso R . P 1 2 . 
H22 H 0.3224 0.0804 0.0603 0.0422 0.119(4) Uiso R . P 1 2 . 
C30 C 0.0250(3) 0.06088(10) 0.36761(6) 0.0328 1.0000 Uani . . . . . . 
C31 C 0.2175(3) 0.10391(11) 0.36646(7) 0.0401 1.0000 Uani D U . . . . 
C32 C 0.2800(3) 0.11837(10) 0.41277(6) 0.0378 1.0000 Uani . . . . . . 
C33 C 0.0890(3) 0.09435(11) 0.43918(7) 0.0381 1.0000 Uani D U . . . . 
C34 C -0.0456(3) 0.05428(9) 0.40884(6) 0.0305 1.0000 Uani . . . . . . 
C35 C -0.2277(3) 0.01552(9) 0.41867(5) 0.0295 1.0000 Uani . . . . . . 
C36 C -0.3021(3) 0.00672(10) 0.46134(5) 0.0329 1.0000 Uani . . . . . . 
C37 C -0.4813(3) -0.02856(9) 0.46915(6) 0.0333 1.0000 Uani . . . . . . 
C38 C -0.5997(3) -0.05932(9) 0.43545(6) 0.0289 1.0000 Uani . . . . . . 
C39 C -0.7885(3) -0.09413(10) 0.44397(6) 0.0326 1.0000 Uani . . . . . . 
C40 C -0.9013(3) -0.12249(10) 0.41099(6) 0.0347 1.0000 Uani . . . . . . 
C41 C -0.8300(3) -0.11756(10) 0.36910(6) 0.0333 1.0000 Uani . . . . . . 
C42 C -0.6432(3) -0.08407(9) 0.35934(5) 0.0299 1.0000 Uani . . . . . . 
C43 C -0.5265(3) -0.05358(9) 0.39295(5) 0.0286 1.0000 Uani . . . . . . 
C44 C -0.3386(3) -0.01585(10) 0.38443(5) 0.0283 1.0000 Uani . . . . . . 
C45 C -0.2643(3) -0.00855(9) 0.34143(5) 0.0277 1.0000 Uani . . . . . . 
C46 C -0.3770(3) -0.04109(10) 0.30747(5) 0.0303 1.0000 Uani . . . . . . 
C47 C -0.5634(3) -0.07949(10) 0.31518(5) 0.0315 1.0000 Uani . . . . . . 
C48 C -0.6620(3) -0.11196(10) 0.28100(6) 0.0359 1.0000 Uani . . . . . . 
C49 C -0.5822(3) -0.10700(11) 0.24005(6) 0.0398 1.0000 Uani . . . . . . 
C50 C -0.4046(3) -0.06910(11) 0.23201(6) 0.0388 1.0000 Uani . . . . . . 
C51 C -0.2982(3) -0.03587(10) 0.26504(6) 0.0358 1.0000 Uani . . . . . . 
C52 C -0.1129(3) 0.00356(10) 0.25752(6) 0.0384 1.0000 Uani . . . . . . 
C53 C -0.0085(3) 0.03507(10) 0.28956(6) 0.0371 1.0000 Uani . . . . . . 
C54 C -0.0816(3) 0.02981(10) 0.33264(6) 0.0320 1.0000 Uani . . . . . . 
C55 C 0.3623(3) 0.19177(11) 0.42250(7) 0.0433 1.0000 Uani . . . . . . 
C56 C 0.2002(3) 0.24643(12) 0.41164(7) 0.0528 1.0000 Uani . . . . . . 
C57 C 0.5622(4) 0.20429(13) 0.39638(10) 0.0742 1.0000 Uani . . . . . . 
C58 C 0.4187(4) 0.19707(13) 0.46971(9) 0.0727 1.0000 Uani . . . . . . 
H321 H 0.3951 0.0858 0.4192 0.0442 1.0000 Uiso R . . . . . 
H361 H -0.2226 0.0278 0.4842 0.0395 1.0000 Uiso R . . . . . 
H371 H -0.5309 -0.0332 0.4982 0.0391 1.0000 Uiso R . . . . . 
H391 H -0.8400 -0.0985 0.4729 0.0385 1.0000 Uiso R . . . . . 
H401 H -1.0345 -0.1449 0.4164 0.0426 1.0000 Uiso R . . . . . 
H411 H -0.9165 -0.1377 0.3456 0.0384 1.0000 Uiso R . . . . . 
H481 H -0.7909 -0.1380 0.2863 0.0420 1.0000 Uiso R . . . . . 
H491 H -0.6564 -0.1299 0.2169 0.0485 1.0000 Uiso R . . . . . 
H501 H -0.3476 -0.0654 0.2029 0.0466 1.0000 Uiso R . . . . . 
H521 H -0.0654 0.0082 0.2283 0.0470 1.0000 Uiso R . . . . . 
H531 H 0.1191 0.0606 0.2851 0.0438 1.0000 Uiso R . . . . . 
H561 H 0.0714 0.2394 0.4291 0.0777 1.0000 Uiso R . . . . . 
H562 H 0.1649 0.2438 0.3808 0.0773 1.0000 Uiso R . . . . . 
H563 H 0.2591 0.2924 0.4175 0.0785 1.0000 Uiso R . . . . . 
H571 H 0.6255 0.2473 0.4064 0.1112 1.0000 Uiso R . . . . . 
H572 H 0.5211 0.2092 0.3663 0.1111 1.0000 Uiso R . . . . . 
H573 H 0.6603 0.1660 0.4011 0.1118 1.0000 Uiso R . . . . . 
H581 H 0.2990 0.1857 0.4880 0.1086 1.0000 Uiso R . . . . . 
H582 H 0.5354 0.1649 0.4755 0.1076 1.0000 Uiso R . . . . . 
H583 H 0.4655 0.2434 0.4750 0.1075 1.0000 Uiso R . . . . . 
O2 O 0.3137(4) 0.12277(13) 0.33716(7) 0.0536 0.631(4) Uani D U P 2 1 . 
H331 H 0.1335 0.0642 0.4641 0.0471 0.631(4) Uiso R . P 2 1 . 
H332 H 0.0096 0.1341 0.4502 0.0470 0.631(4) Uiso R . P 2 1 . 
O102 O 0.0536(6) 0.1109(2) 0.47250(12) 0.0520 0.369(4) Uani D U P 2 2 . 
H311 H 0.3287 0.0800 0.3513 0.0485 0.369(4) Uiso R . P 2 2 . 
H312 H 0.1876 0.1470 0.3510 0.0482 0.369(4) Uiso R . P 2 2 . 
loop_
_atom_site_aniso_label
_atom_site_aniso_U_11
_atom_site_aniso_U_22
_atom_site_aniso_U_33
_atom_site_aniso_U_23
_atom_site_aniso_U_13
_atom_site_aniso_U_12
C1 0.0273(10) 0.0303(10) 0.0301(10) 0.0008(8) -0.0004(7) 0.0022(8) 
C2 0.0365(11) 0.0382(12) 0.0322(12) -0.0011(8) -0.0019(8) -0.0014(8) 
C3 0.0277(10) 0.0331(11) 0.0393(10) -0.0009(8) -0.0033(8) -0.0034(8) 
C4 0.0333(12) 0.0324(11) 0.0397(11) -0.0014(8) -0.0014(9) -0.0009(9) 
C5 0.0283(11) 0.0288(11) 0.0332(10) 0.0022(8) 0.0010(8) 0.0002(8) 
C6 0.0269(10) 0.0296(11) 0.0314(10) 0.0017(7) 0.0005(7) 0.0023(8) 
C7 0.0336(11) 0.0360(12) 0.0332(10) -0.0008(8) 0.0044(8) -0.0021(9) 
C8 0.0381(11) 0.0462(13) 0.0299(10) -0.0013(9) 0.0038(8) 0.0003(9) 
C9 0.0347(11) 0.0318(11) 0.0312(10) -0.0002(8) -0.0033(8) 0.0019(9) 
C10 0.0456(13) 0.0442(13) 0.0326(10) -0.0038(9) -0.0029(8) -0.0022(10) 
C11 0.0421(13) 0.0434(13) 0.0400(12) -0.0049(9) -0.0066(8) -0.0058(10) 
C12 0.0352(11) 0.0404(12) 0.0368(10) -0.0016(9) -0.0050(8) -0.0030(9) 
C13 0.0274(10) 0.0304(11) 0.0333(10) -0.0012(8) -0.0047(7) 0.0032(8) 
C14 0.0314(10) 0.0283(11) 0.0318(10) 0.0006(8) -0.0038(7) 0.0046(8) 
C15 0.0271(10) 0.0285(10) 0.0305(9) 0.0016(7) -0.0015(7) 0.0060(8) 
C16 0.0266(10) 0.0271(10) 0.0300(9) 0.0026(7) 0.0019(7) 0.0036(8) 
C17 0.0256(10) 0.0250(10) 0.0328(9) 0.0020(7) 0.0002(7) 0.0023(8) 
C18 0.0253(10) 0.0263(11) 0.0389(10) 0.0001(8) -0.0020(8) 0.0013(8) 
C19 0.0274(10) 0.0303(11) 0.0402(10) 0.0024(8) 0.0003(8) -0.0008(8) 
C20 0.0277(10) 0.0307(11) 0.0469(11) 0.0028(9) 0.0020(8) -0.0018(8) 
C21 0.0331(11) 0.0316(11) 0.0359(10) 0.0027(8) 0.0045(8) 0.0015(9) 
C22 0.0265(10) 0.0290(10) 0.0361(10) 0.0032(8) 0.0024(7) 0.0035(8) 
C23 0.0322(11) 0.0360(11) 0.0303(10) 0.0024(8) 0.0033(8) -0.0008(9) 
C24 0.0332(11) 0.0369(11) 0.0293(10) -0.0002(8) 0.0002(8) 0.0007(9) 
C25 0.0250(9) 0.0286(10) 0.0311(10) 0.0000(7) -0.0007(7) 0.0041(8) 
C26 0.0581(15) 0.0387(12) 0.0342(11) 0.0003(9) -0.0003(10) -0.0154(10) 
C27 0.097(2) 0.0391(14) 0.0520(15) 0.0008(10) 0.0072(13) 0.0197(13) 
C28 0.112(2) 0.0640(18) 0.0392(13) -0.0004(11) -0.0131(13) -0.0467(16) 
C29 0.0725(17) 0.0627(17) 0.0415(12) 0.0025(11) 0.0003(11) -0.0352(13) 
O1 0.0463(10) 0.0585(12) 0.0315(10) -0.0027(7) -0.0012(7) -0.0163(8) 
O101 0.040(6) 0.049(7) 0.047(6) -0.011(5) 0.016(5) 0.000(5) 
C30 0.0260(10) 0.0321(11) 0.0404(11) 0.0029(8) 0.0021(8) 0.0022(8) 
C31 0.0293(11) 0.0395(12) 0.0514(13) 0.0040(10) 0.0048(10) 0.0031(9) 
C32 0.0268(10) 0.0326(11) 0.0541(12) 0.0034(9) 0.0014(9) -0.0002(8) 
C33 0.0320(11) 0.0373(12) 0.0449(13) -0.0027(10) 0.0023(9) 0.0011(9) 
C34 0.0275(10) 0.0269(10) 0.0372(10) 0.0017(8) 0.0002(8) 0.0033(8) 
C35 0.0243(9) 0.0293(10) 0.0350(9) 0.0018(8) 0.0000(7) 0.0030(8) 
C36 0.0334(10) 0.0367(11) 0.0284(9) 0.0012(8) -0.0001(8) 0.0008(9) 
C37 0.0352(11) 0.0344(11) 0.0302(10) 0.0045(8) 0.0018(8) 0.0023(9) 
C38 0.0280(10) 0.0281(10) 0.0307(9) 0.0042(8) 0.0010(7) 0.0059(8) 
C39 0.0316(11) 0.0348(11) 0.0313(10) 0.0043(8) 0.0039(8) 0.0038(8) 
C40 0.0303(11) 0.0304(11) 0.0435(12) 0.0011(8) 0.0033(8) -0.0002(8) 
C41 0.0269(10) 0.0321(11) 0.0410(11) -0.0002(8) -0.0013(9) 0.0014(8) 
C42 0.0309(10) 0.0249(10) 0.0338(10) 0.0032(7) 0.0025(7) 0.0042(8) 
C43 0.0281(10) 0.0257(10) 0.0319(10) 0.0035(8) 0.0021(8) 0.0032(8) 
C44 0.0270(10) 0.0280(10) 0.0299(9) 0.0034(8) 0.0004(7) 0.0054(8) 
C45 0.0245(10) 0.0278(10) 0.0307(9) 0.0020(7) 0.0028(7) 0.0047(8) 
C46 0.0312(10) 0.0306(11) 0.0290(10) 0.0043(8) -0.0010(8) 0.0061(8) 
C47 0.0325(11) 0.0305(11) 0.0314(10) 0.0034(8) -0.0009(8) 0.0063(8) 
C48 0.0341(11) 0.0399(13) 0.0336(11) 0.0014(8) -0.0034(8) -0.0004(9) 
C49 0.0439(13) 0.0422(13) 0.0332(11) 0.0022(9) -0.0067(8) 0.0058(10) 
C50 0.0439(13) 0.0454(13) 0.0273(10) 0.0047(9) 0.0006(8) 0.0071(10) 
C51 0.0375(12) 0.0385(12) 0.0315(10) 0.0068(8) -0.0010(8) 0.0091(9) 
C52 0.0367(12) 0.0428(13) 0.0356(10) 0.0083(9) 0.0085(9) 0.0042(9) 
C53 0.0332(11) 0.0430(13) 0.0350(11) 0.0074(9) 0.0066(8) 0.0016(9) 
C54 0.0294(11) 0.0327(11) 0.0341(10) 0.0053(8) 0.0031(8) 0.0043(8) 
C55 0.0364(12) 0.0314(12) 0.0622(13) 0.0010(10) -0.0048(9) 0.0002(9) 
C56 0.0479(14) 0.0398(13) 0.0706(15) 0.0034(10) -0.0004(11) 0.0059(10) 
C57 0.0464(14) 0.0367(14) 0.139(3) -0.0001(15) 0.0178(15) -0.0083(12) 
C58 0.093(2) 0.0401(14) 0.0849(19) -0.0056(13) -0.0357(15) -0.0141(13) 
O2 0.0451(15) 0.073(2) 0.0432(15) 0.0065(11) 0.0092(11) -0.0197(13) 
O102 0.059(3) 0.057(3) 0.040(3) -0.0082(19) 0.0043(19) -0.012(2) 

_refine_ls_extinction_method 
    'None'
_oxford_refine_ls_scale 0.3726(4) 
loop_
 _geom_bond_atom_site_label_1
 _geom_bond_site_symmetry_1
 _geom_bond_atom_site_label_2
 _geom_bond_site_symmetry_2
 _geom_bond_distance
 _geom_bond_publ_flag
C1 . C2 . 1.467(3)    yes
C1 . C5 . 1.372(2)    yes
C1 . C25 . 1.428(2)    yes
C2 . C3 . 1.530(3)    yes
C2 . O1 . 1.191(2)    yes
C2 . C3 . 1.530(3)    yes
C2 . H21 . 0.972    no
C2 . H22 . 0.975    no
C3 . C4 . 1.542(3)    yes
C3 . C26 . 1.548(3)    yes
C3 . H31 . 1.005    no
C4 . C5 . 1.499(3)    yes
C4 . H41 . 0.986    no
C4 . H42 . 0.969    no
C4 . C5 . 1.499(3)    yes
C4 . O101 . 1.101(8)    yes
C5 . C6 . 1.413(2)    yes
C6 . C7 . 1.430(2)    yes
C6 . C15 . 1.415(2)    yes
C7 . C8 . 1.354(3)    yes
C7 . H71 . 0.965    no
C8 . C9 . 1.429(3)    yes
C8 . H81 . 0.978    no
C9 . C10 . 1.412(3)    yes
C9 . C14 . 1.416(2)    yes
C10 . C11 . 1.371(3)    yes
C10 . H101 . 0.961    no
C11 . C12 . 1.388(3)    yes
C11 . H111 . 0.976    no
C12 . C13 . 1.394(2)    yes
C12 . H121 . 0.967    no
C13 . C14 . 1.424(2)    yes
C13 . C18 . 1.466(2)    yes
C14 . C15 . 1.437(2)    yes
C15 . C16 . 1.429(2)    yes
C16 . C17 . 1.433(2)    yes
C16 . C25 . 1.421(2)    yes
C17 . C18 . 1.424(2)    yes
C17 . C22 . 1.424(2)    yes
C18 . C19 . 1.393(3)    yes
C19 . C20 . 1.384(3)    yes
C19 . H191 . 0.990    no
C20 . C21 . 1.375(2)    yes
C20 . H201 . 0.952    no
C21 . C22 . 1.401(2)    yes
C21 . H211 . 0.958    no
C22 . C23 . 1.430(2)    yes
C23 . C24 . 1.346(2)    yes
C23 . H231 . 0.958    no
C24 . C25 . 1.427(2)    yes
C24 . H241 . 0.964    no
C26 . C27 . 1.527(3)    yes
C26 . C28 . 1.525(3)    yes
C26 . C29 . 1.534(3)    yes
C27 . H271 . 0.997    no
C27 . H272 . 1.012    no
C27 . H273 . 0.980    no
C28 . H281 . 0.984    no
C28 . H282 . 0.980    no
C28 . H283 . 0.983    no
C29 . H291 . 0.993    no
C29 . H292 . 0.993    no
C29 . H293 . 0.988    no
C30 . C31 . 1.484(3)    yes
C30 . C34 . 1.373(3)    yes
C30 . C54 . 1.422(3)    yes
C31 . C32 . 1.530(3)    yes
C31 . O2 . 1.162(3)    yes
C31 . C32 . 1.530(3)    yes
C31 . H311 . 0.971    no
C31 . H312 . 0.983    no
C32 . C33 . 1.544(3)    yes
C32 . C55 . 1.545(3)    yes
C32 . H321 . 0.989    no
C33 . C34 . 1.497(3)    yes
C33 . H331 . 1.015    no
C33 . H332 . 0.983    no
C33 . C34 . 1.497(3)    yes
C33 . O102 . 1.114(4)    yes
C34 . C35 . 1.417(2)    yes
C35 . C36 . 1.428(2)    yes
C35 . C44 . 1.421(2)    yes
C36 . C37 . 1.353(3)    yes
C36 . H361 . 0.968    no
C37 . C38 . 1.428(3)    yes
C37 . H371 . 0.967    no
C38 . C39 . 1.406(2)    yes
C38 . C43 . 1.415(2)    yes
C39 . C40 . 1.373(3)    yes
C39 . H391 . 0.969    no
C40 . C41 . 1.391(3)    yes
C40 . H401 . 0.969    no
C41 . C42 . 1.390(3)    yes
C41 . H411 . 1.000    no
C42 . C43 . 1.418(2)    yes
C42 . C47 . 1.476(2)    yes
C43 . C44 . 1.428(2)    yes
C44 . C45 . 1.434(2)    yes
C45 . C46 . 1.430(2)    yes
C45 . C54 . 1.409(2)    yes
C46 . C47 . 1.423(3)    yes
C46 . C51 . 1.424(3)    yes
C47 . C48 . 1.391(3)    yes
C48 . C49 . 1.383(3)    yes
C48 . H481 . 0.979    no
C49 . C50 . 1.373(3)    yes
C49 . H491 . 0.972    no
C50 . C51 . 1.394(3)    yes
C50 . H501 . 0.984    no
C51 . C52 . 1.427(3)    yes
C52 . C53 . 1.350(3)    yes
C52 . H521 . 0.967    no
C53 . C54 . 1.431(3)    yes
C53 . H531 . 0.962    no
C55 . C56 . 1.518(3)    yes
C55 . C57 . 1.534(3)    yes
C55 . C58 . 1.525(3)    yes
C56 . H561 . 0.996    no
C56 . H562 . 0.993    no
C56 . H563 . 0.983    no
C57 . H571 . 0.978    no
C57 . H572 . 0.982    no
C57 . H573 . 0.982    no
C58 . H581 . 0.980    no
C58 . H582 . 0.988    no
C58 . H583 . 0.960    no
loop_
 _geom_angle_atom_site_label_1
 _geom_angle_site_symmetry_1
 _geom_angle_atom_site_label_2
 _geom_angle_site_symmetry_2
 _geom_angle_atom_site_label_3
 _geom_angle_site_symmetry_3
 _geom_angle
 _geom_angle_publ_flag
C2 . C1 . C5 . 109.85(16)    yes
C2 . C1 . C25 . 128.43(15)    yes
C5 . C1 . C25 . 121.72(16)    yes
C1 . C2 . C3 . 108.37(15)    yes
C1 . C2 . O1 . 127.31(18)    yes
C3 . C2 . O1 . 124.30(18)    yes
C1 . C2 . C3 . 108.37(15)    yes
C1 . C2 . H21 . 110.0    no
C3 . C2 . H21 . 109.7    no
C1 . C2 . H22 . 109.6    no
C3 . C2 . H22 . 109.7    no
H21 . C2 . H22 . 109.5    no
C2 . C3 . C4 . 104.38(15)    yes
C2 . C3 . C26 . 114.38(16)    yes
C4 . C3 . C26 . 114.98(15)    yes
C2 . C3 . H31 . 108.1    no
C4 . C3 . H31 . 108.5    no
C26 . C3 . H31 . 106.3    no
C3 . C4 . C5 . 105.50(15)    yes
C3 . C4 . H41 . 111.5    no
C5 . C4 . H41 . 109.8    no
C3 . C4 . H42 . 111.7    no
C5 . C4 . H42 . 111.2    no
H41 . C4 . H42 . 107.2    no
C3 . C4 . C5 . 105.50(15)    yes
C3 . C4 . O101 . 118.8(6)    yes
C5 . C4 . O101 . 131.3(6)    yes
C4 . C5 . C1 . 111.84(16)    yes
C4 . C5 . C6 . 126.46(16)    yes
C1 . C5 . C6 . 121.69(16)    yes
C5 . C6 . C7 . 122.34(16)    yes
C5 . C6 . C15 . 118.21(15)    yes
C7 . C6 . C15 . 119.45(16)    yes
C6 . C7 . C8 . 121.17(17)    yes
C6 . C7 . H71 . 117.8    no
C8 . C7 . H71 . 121.0    no
C7 . C8 . C9 . 120.74(17)    yes
C7 . C8 . H81 . 120.4    no
C9 . C8 . H81 . 118.9    no
C8 . C9 . C10 . 121.10(17)    yes
C8 . C9 . C14 . 119.93(16)    yes
C10 . C9 . C14 . 118.96(17)    yes
C9 . C10 . C11 . 120.26(18)    yes
C9 . C10 . H101 . 119.9    no
C11 . C10 . H101 . 119.8    no
C10 . C11 . C12 . 120.97(18)    yes
C10 . C11 . H111 . 119.4    no
C12 . C11 . H111 . 119.6    no
C11 . C12 . C13 . 121.33(18)    yes
C11 . C12 . H121 . 119.8    no
C13 . C12 . H121 . 118.9    no
C12 . C13 . C14 . 118.17(16)    yes
C12 . C13 . C18 . 122.34(16)    yes
C14 . C13 . C18 . 119.48(15)    yes
C13 . C14 . C9 . 120.30(16)    yes
C13 . C14 . C15 . 120.63(15)    yes
C9 . C14 . C15 . 119.06(16)    yes
C14 . C15 . C6 . 119.62(15)    yes
C14 . C15 . C16 . 119.90(15)    yes
C6 . C15 . C16 . 120.47(16)    yes
C15 . C16 . C17 . 119.84(15)    yes
C15 . C16 . C25 . 120.35(16)    yes
C17 . C16 . C25 . 119.80(15)    yes
C16 . C17 . C18 . 120.99(15)    yes
C16 . C17 . C22 . 119.38(14)    yes
C18 . C17 . C22 . 119.63(16)    yes
C13 . C18 . C17 . 119.09(15)    yes
C13 . C18 . C19 . 122.71(16)    yes
C17 . C18 . C19 . 118.19(16)    yes
C18 . C19 . C20 . 121.75(17)    yes
C18 . C19 . H191 . 118.6    no
C20 . C19 . H191 . 119.6    no
C19 . C20 . C21 . 120.67(17)    yes
C19 . C20 . H201 . 120.3    no
C21 . C20 . H201 . 119.1    no
C20 . C21 . C22 . 120.22(16)    yes
C20 . C21 . H211 . 120.7    no
C22 . C21 . H211 . 119.1    no
C17 . C22 . C21 . 119.52(16)    yes
C17 . C22 . C23 . 118.65(15)    yes
C21 . C22 . C23 . 121.82(16)    yes
C22 . C23 . C24 . 122.03(16)    yes
C22 . C23 . H231 . 118.2    no
C24 . C23 . H231 . 119.8    no
C23 . C24 . C25 . 120.94(17)    yes
C23 . C24 . H241 . 121.6    no
C25 . C24 . H241 . 117.5    no
C1 . C25 . C24 . 123.29(16)    yes
C1 . C25 . C16 . 117.55(15)    yes
C24 . C25 . C16 . 119.16(16)    yes
C3 . C26 . C27 . 109.88(16)    yes
C3 . C26 . C28 . 110.43(17)    yes
C27 . C26 . C28 . 109.6(2)    yes
C3 . C26 . C29 . 109.03(18)    yes
C27 . C26 . C29 . 110.16(19)    yes
C28 . C26 . C29 . 107.67(18)    yes
C26 . C27 . H271 . 109.4    no
C26 . C27 . H272 . 111.7    no
H271 . C27 . H272 . 110.1    no
C26 . C27 . H273 . 108.6    no
H271 . C27 . H273 . 108.9    no
H272 . C27 . H273 . 108.0    no
C26 . C28 . H281 . 109.4    no
C26 . C28 . H282 . 109.2    no
H281 . C28 . H282 . 109.0    no
C26 . C28 . H283 . 110.3    no
H281 . C28 . H283 . 107.7    no
H282 . C28 . H283 . 111.1    no
C26 . C29 . H291 . 108.6    no
C26 . C29 . H292 . 110.7    no
H291 . C29 . H292 . 110.3    no
C26 . C29 . H293 . 108.3    no
H291 . C29 . H293 . 109.9    no
H292 . C29 . H293 . 108.9    no
C31 . C30 . C34 . 110.27(17)    yes
C31 . C30 . C54 . 127.89(17)    yes
C34 . C30 . C54 . 121.84(17)    yes
C30 . C31 . C32 . 107.17(16)    yes
C30 . C31 . O2 . 129.2(2)    yes
C32 . C31 . O2 . 123.6(2)    yes
C30 . C31 . C32 . 107.17(16)    yes
C30 . C31 . H311 . 110.4    no
C32 . C31 . H311 . 111.2    no
C30 . C31 . H312 . 109.1    no
C32 . C31 . H312 . 111.3    no
H311 . C31 . H312 . 107.7    no
C31 . C32 . C33 . 104.31(15)    yes
C31 . C32 . C55 . 116.34(17)    yes
C33 . C32 . C55 . 116.06(16)    yes
C31 . C32 . H321 . 105.7    no
C33 . C32 . H321 . 106.5    no
C55 . C32 . H321 . 107.1    no
C32 . C33 . C34 . 105.57(17)    yes
C32 . C33 . H331 . 111.3    no
C34 . C33 . H331 . 110.5    no
C32 . C33 . H332 . 111.0    no
C34 . C33 . H332 . 109.4    no
H331 . C33 . H332 . 108.9    no
C32 . C33 . C34 . 105.57(17)    yes
C32 . C33 . O102 . 125.1(3)    yes
C34 . C33 . O102 . 128.8(3)    yes
C33 . C34 . C30 . 111.12(16)    yes
C33 . C34 . C35 . 127.34(17)    yes
C30 . C34 . C35 . 121.50(17)    yes
C34 . C35 . C36 . 122.61(16)    yes
C34 . C35 . C44 . 118.07(16)    yes
C36 . C35 . C44 . 119.32(16)    yes
C35 . C36 . C37 . 120.64(16)    yes
C35 . C36 . H361 . 117.9    no
C37 . C36 . H361 . 121.4    no
C36 . C37 . C38 . 121.58(17)    yes
C36 . C37 . H371 . 119.5    no
C38 . C37 . H371 . 118.9    no
C37 . C38 . C39 . 120.86(17)    yes
C37 . C38 . C43 . 119.19(16)    yes
C39 . C38 . C43 . 119.95(17)    yes
C38 . C39 . C40 . 119.84(16)    yes
C38 . C39 . H391 . 120.7    no
C40 . C39 . H391 . 119.5    no
C39 . C40 . C41 . 120.70(17)    yes
C39 . C40 . H401 . 120.4    no
C41 . C40 . H401 . 118.9    no
C40 . C41 . C42 . 121.28(17)    yes
C40 . C41 . H411 . 119.2    no
C42 . C41 . H411 . 119.5    no
C41 . C42 . C43 . 118.75(16)    yes
C41 . C42 . C47 . 121.96(17)    yes
C43 . C42 . C47 . 119.29(16)    yes
C42 . C43 . C38 . 119.47(15)    yes
C42 . C43 . C44 . 120.98(15)    yes
C38 . C43 . C44 . 119.53(16)    yes
C43 . C44 . C35 . 119.68(15)    yes
C43 . C44 . C45 . 120.20(15)    yes
C35 . C44 . C45 . 120.11(16)    yes
C44 . C45 . C46 . 119.26(15)    yes
C44 . C45 . C54 . 120.57(16)    yes
C46 . C45 . C54 . 120.17(15)    yes
C45 . C46 . C47 . 121.59(15)    yes
C45 . C46 . C51 . 119.05(17)    yes
C47 . C46 . C51 . 119.35(17)    yes
C42 . C47 . C46 . 118.58(16)    yes
C42 . C47 . C48 . 122.52(17)    yes
C46 . C47 . C48 . 118.89(16)    yes
C47 . C48 . C49 . 121.02(19)    yes
C47 . C48 . H481 . 118.8    no
C49 . C48 . H481 . 120.1    no
C48 . C49 . C50 . 120.73(19)    yes
C48 . C49 . H491 . 118.6    no
C50 . C49 . H491 . 120.6    no
C49 . C50 . C51 . 120.80(17)    yes
C49 . C50 . H501 . 120.9    no
C51 . C50 . H501 . 118.3    no
C46 . C51 . C50 . 119.19(17)    yes
C46 . C51 . C52 . 118.96(18)    yes
C50 . C51 . C52 . 121.85(17)    yes
C51 . C52 . C53 . 121.86(17)    yes
C51 . C52 . H521 . 117.7    no
C53 . C52 . H521 . 120.4    no
C52 . C53 . C54 . 120.50(18)    yes
C52 . C53 . H531 . 122.7    no
C54 . C53 . H531 . 116.7    no
C53 . C54 . C30 . 122.66(17)    yes
C53 . C54 . C45 . 119.43(17)    yes
C30 . C54 . C45 . 117.91(16)    yes
C32 . C55 . C56 . 111.43(17)    yes
C32 . C55 . C57 . 108.82(17)    yes
C56 . C55 . C57 . 109.67(19)    yes
C32 . C55 . C58 . 109.46(17)    yes
C56 . C55 . C58 . 109.33(18)    yes
C57 . C55 . C58 . 108.1(2)    yes
C55 . C56 . H561 . 110.1    no
C55 . C56 . H562 . 109.7    no
H561 . C56 . H562 . 109.8    no
C55 . C56 . H563 . 109.2    no
H561 . C56 . H563 . 109.7    no
H562 . C56 . H563 . 108.3    no
C55 . C57 . H571 . 107.8    no
C55 . C57 . H572 . 107.8    no
H571 . C57 . H572 . 109.7    no
C55 . C57 . H573 . 109.3    no
H571 . C57 . H573 . 109.4    no
H572 . C57 . H573 . 112.7    no
C55 . C58 . H581 . 111.5    no
C55 . C58 . H582 . 108.2    no
H581 . C58 . H582 . 109.8    no
C55 . C58 . H583 . 107.7    no
H581 . C58 . H583 . 110.6    no
H582 . C58 . H583 . 108.9    no
loop_
 _geom_hbond_atom_site_label_D
 _geom_hbond_site_symmetry_D
 _geom_hbond_atom_site_label_H
 _geom_hbond_site_symmetry_H
 _geom_hbond_atom_site_label_A
 _geom_hbond_site_symmetry_A
 _geom_hbond_angle_DHA
 _geom_hbond_distance_DH
 _geom_hbond_distance_HA
 _geom_hbond_distance_DA
 _geom_hbond_publ_flag
C7 . H71 . O101 . 124.4(2) 0.965 2.438 3.087(3)    yes
C8 . H81 . O2 . 146.72(7) 0.978 2.415 3.277(3)    yes
C24 . H241 . O1 . 125.65(5) 0.964 2.376 3.040(3)    yes
C28 . H283 . O1 . 122.58(7) 0.983 2.380 3.025(3)    yes
O1 . H21 . C27 . 139.52(18) 1.029 2.560 3.409(3)    yes
C36 . H361 . O102 . 123.43(10) 0.968 2.413 3.055(3)    yes
C39 . H391 . O1 4_455 147.15(6) 0.969 2.544 3.399(3)    yes
C52 . H521 . O101 . 150.7(3) 0.967 2.163 3.043(3)    yes
C53 . H531 . O2 . 126.98(7) 0.962 2.377 3.054(3)    yes
C58 . H581 . O102 . 125.27(13) 0.980 2.187 2.867(3)    yes


_iucr_refine_instructions_details
;
#
# Punched on 07/04/16 at 10:58:10
#
#LIST     12                                                                    
BLOCK SCALE X'S  U'S 
CONT ENANTIO 
EQUIVALENCE PART(1001, OCC) PART(1002, OCC) 
WEIGHT -1   PART(1002, OCC) 
EQUIVALENCE PART(2001, OCC) PART(2002, OCC) 
WEIGHT -1   PART(2002, OCC) 
RIDE C   (   2,X'S) H   (  21,X'S) H   (  22,X'S) 
RIDE C   (   3,X'S) H   (  31,X'S) 
RIDE C   (   4,X'S) H   (  41,X'S) H   (  42,X'S) 
RIDE C   (   7,X'S) H   (  71,X'S) 
RIDE C   (   8,X'S) H   (  81,X'S) 
RIDE C   (  10,X'S) H   ( 101,X'S) 
RIDE C   (  11,X'S) H   ( 111,X'S) 
RIDE C   (  12,X'S) H   ( 121,X'S) 
RIDE C   (  19,X'S) H   ( 191,X'S) 
RIDE C   (  20,X'S) H   ( 201,X'S) 
RIDE C   (  21,X'S) H   ( 211,X'S) 
RIDE C   (  23,X'S) H   ( 231,X'S) 
RIDE C   (  24,X'S) H   ( 241,X'S) 
RIDE C   (  27,X'S) H   ( 271,X'S) H   ( 272,X'S) H   ( 273,X'S) 
RIDE C   (  28,X'S) H   ( 281,X'S) H   ( 282,X'S) H   ( 283,X'S) 
RIDE C   (  29,X'S) H   ( 291,X'S) H   ( 292,X'S) H   ( 293,X'S) 
RIDE C   (  31,X'S) H   ( 311,X'S) H   ( 312,X'S) 
RIDE C   (  32,X'S) H   ( 321,X'S) 
RIDE C   (  33,X'S) H   ( 331,X'S) H   ( 332,X'S) 
RIDE C   (  36,X'S) H   ( 361,X'S) 
RIDE C   (  37,X'S) H   ( 371,X'S) 
RIDE C   (  39,X'S) H   ( 391,X'S) 
RIDE C   (  40,X'S) H   ( 401,X'S) 
RIDE C   (  41,X'S) H   ( 411,X'S) 
RIDE C   (  48,X'S) H   ( 481,X'S) 
RIDE C   (  49,X'S) H   ( 491,X'S) 
RIDE C   (  50,X'S) H   ( 501,X'S) 
RIDE C   (  52,X'S) H   ( 521,X'S) 
RIDE C   (  53,X'S) H   ( 531,X'S) 
RIDE C   (  56,X'S) H   ( 561,X'S) H   ( 562,X'S) H   ( 563,X'S) 
RIDE C   (  57,X'S) H   ( 571,X'S) H   ( 572,X'S) H   ( 573,X'S) 
RIDE C   (  58,X'S) H   ( 581,X'S) H   ( 582,X'S) H   ( 583,X'S) 
END                                                                             
#
# Punched on 07/04/16 at 10:58:10
#
#LIST     16                                                                    
DIST 0.0,0.01 = MEAN 
CONT C(2) TO O(1) C(4) TO O(101) 
CONT C(31) TO O(2) C(33) TO O(102) 
VIBRA 0.0,0.01 = 
CONT C(2) TO O(1) C(4) TO O(101) 
CONT C(31) TO O(2) C(33) TO O(102) 
U(IJ)'S 0.0,0.01 = 
CONT C(2) TO O(1) C(4) TO O(101) 
CONT C(31) TO O(2) C(33) TO O(102) 
REM   HREST   START (DO NOT REMOVE THIS LINE) 
REM   HREST   END (DO NOT REMOVE THIS LINE) 
END                                                                             
;
